# Supplementary material for: The Influence of Various Smoking Categories on The Risk of Gestational Hypertension and Pre-Eclampsia
Source: PubMed Central journal article supplement (PMC7356904; doi:10.3390/jcm9061743), 2020-06-04
Supplement: jcm-09-01743-s001.pdf [file jcm-09-01743-s001.pdf]

## Supplementary Materials

**Table S1.** Full characteristics of mothers in the control and PIH group.

| Maternal Characteristics                    | Normotensives ( <i>n</i> = 775) *    | PIH cases ( <i>n</i> = 137) *        | <i>p</i> ** |
|---------------------------------------------|--------------------------------------|--------------------------------------|-------------|
|                                             | Mean (SD); Median<br>or <i>n</i> (%) | Mean (SD); Median<br>or <i>n</i> (%) |             |
| <b>Basic</b>                                |                                      |                                      |             |
| Maternal age (years)                        | 33.5 (4.8); 35.0                     | 34.8 (4.4); 35.0                     | 0.005       |
| Maternal age (range)                        | (18–45)                              | (19–45)                              |             |
| Primiparous                                 | 318 (41.0%)                          | 65 (47.5%)                           | 0.161       |
| Prior PIH                                   | 4 (0.5%)                             | 15 (11.0%)                           | <0.00001    |
| Infertility treatment                       | 29 (3.7%)                            | 11 (8.0%)                            | 0.024       |
| GWG/week (kg/week) ***                      | 0.35 (0.14); 0.34                    | 0.39 (0.21); 0.38                    | 0.024       |
| Education <12 years                         | 48 (7.1%)                            | 22 (18.3%)                           | 0.0001      |
| Pre-pregnancy BMI (kg/m <sup>2</sup> )      | 23.3 (4.1); 22.5                     | 26.7 (5.4); 25.3                     | <0.001      |
| Pre-pregnancy BMI (range)                   | (14.6–39.4)                          | (16.3–42.9)                          |             |
| Pre-pregnancy underweight                   | 44 (5.7%)                            | 3 (2.2%)                             | 0.089       |
| <b>Smoking characteristics</b>              |                                      |                                      |             |
| Smokers                                     | <i>n</i> = 133                       | <i>n</i> = 35                        |             |
| How long (years) (available = 900)          | 1.30 (3.69); 0.0                     | 2.39 (5.26); 0.0                     | 0.011       |
| No of cigarettes/day (available = 899)      | 1.68 (8.24); 0.0                     | 2.94 (6.24); 0.0                     | 0.005       |
| Pack-years (available = 899)                | 0.75 (3.49); 0.0                     | 1.61 (4.58); 0.0                     | 0.008       |
| Smokers in the first trimester              | <i>n</i> = 37                        | <i>n</i> = 20                        |             |
| How long (years) (available = 53)           | 11.1 (6.7); 10                       | 12.6 (7.0); 13.5                     | 0.497       |
| Range                                       | 2–25                                 | 2–22                                 |             |
| Cigarettes/day (available = 54)             | 10 (5.7); 10                         | 13.4 (7.1); 10                       | 0.089       |
| Range                                       | 2–20                                 | 3–30                                 |             |
| Pack-years (available = 53)                 | 6.4 (6.5); 3.8                       | 9.2 (8.3); 5.6                       | 0.156       |
| Range                                       | 0.3–23.0                             | 1.0–31.5                             |             |
| Quit smoking during pregnancy               | 9 (24.3%)                            | 13 (65.0%)                           | 0.003       |
| Reduced smoking during pregnancy            | 6 (16.2%)                            | 4 (20.0%)                            | 0.720       |
| Smoked unchanged until the end of pregnancy | 22 (59.5%)                           | 3 (15.0%)                            | 0.001       |
| <b>Pregnancy results</b>                    |                                      |                                      |             |
| Fetal sex- son                              | 405 (52.3%)                          | 68 (49.6%)                           | 0.571       |
| Gestational age at delivery (week)          | 38.9 (1.6); 39.0                     | 37.7 (2.8); 38.0                     | <0.0001     |
| Newborn birthweight (g)                     | 3416.5 (511.7); 3449.0               | 3020.0 (838.0); 3130.0               | <0.0001     |
| Preeclampsia                                | –                                    | 24                                   | –           |
| Gestational hypertension                    | –                                    | 113                                  | –           |
| SABP after delivery (mmHg)                  | 107.9 (10.8); 110.0                  | 159.5 (18.2); 160.0                  | <0.001      |
| DABP after delivery (mmHg)                  | 66.8 (8.8); 70.0                     | 100.9 (11.0); 100.0                  | <0.001      |
| Gestational diabetes mellitus (GDM)         | 121 (15.6%)                          | 25 (18.3%)                           | 0.438       |

\* Normotensive controls and cases of pregnancy-induced hypertension (PIH);

\*\* The Mann-Whitney *U* test was used for comparisons of continuous variables; For binomial categories the Pearson chi-square test (or Fisher exact test when Cochran assumption was not met) was used (*p* <0.05 was assumed to be significant);

\*\*\* GWG: gestational weight gain; SABP—systolic arterial blood pressure; DABP—diastolic arterial blood pressure.

**Table S2.** The adjusted odds ratios of gestational hypertension (GH) and preeclampsia (PE) for all smoking categories.

|                                                       | Odds Ratios of Two Forms of GH and PE for All Smoking Categories |                             |                             |
|-------------------------------------------------------|------------------------------------------------------------------|-----------------------------|-----------------------------|
|                                                       | Cases/<br>controls                                               | OR (95% CI); <i>p</i>       | AOR * (95% CI); <i>p</i>    |
| <b>Gestational hypertension (GH) risk</b>             |                                                                  |                             |                             |
| Smokers                                               | 31/133                                                           | 1.83 (1.16–2.87); 0.009     | 1.68 (1.02–2.78); 0.043     |
| Smokers in the first trimester                        | 17/37                                                            | 3.60 (1.94–6.68); <0.001    | 4.75 (2.34–9.65); <0.001    |
| Ex-smokers                                            | 14/96                                                            | 1.14 (0.62–2.09); 0.668     | 0.83 (0.41–1.66); 0.596     |
| Women who have never smoked **                        | 82/642                                                           | 1                           | 1                           |
| Women who quit smoking in pregnancy                   | 12/9                                                             | 10.44 (4.27–25.53); <0.0001 | 11.63 (4.07–33.24); <0.0001 |
| Women who reduced smoking in pregnancy                | 3/6                                                              | 3.91 (0.96–15.95); 0.057    | 3.81 (0.81–18.05); 0.092    |
| Women who smoked unchanged until the end of pregnancy | 2/22                                                             | 0.71 (0.16–3.08); 0.649     | 1.00 (0.21–4.64); 0.999     |
| Women who have never smoked ***                       | 82/642                                                           | 1                           | 1                           |
| Ex-smokers                                            | 14/96                                                            | 0.32 (0.14–0.71); 0.005     | 0.14 (0.05–0.41); <0.001    |
| Smokers in the first trimester **                     | 17/37                                                            | 1                           | 1                           |
| Women who quit smoking in pregnancy                   | 12/9                                                             | 7.47 (2.07–27.0); 0.002     | 13.54 (2.26–81.1); 0.004    |
| Women who reduced smoking in pregnancy                | 3/6                                                              | 1.11 (0.24–5.08); 0.896     | 1.01 (0.17–5.90); 0.994     |
| Women who smoked unchanged until the end of pregnancy | 2/22                                                             | 0.09 (0.02–0.46); 0.004     | 0.06 (0.01–0.42); 0.005     |
| Smokers in the first trimester *** #                  | 17/37                                                            | 1                           | 1                           |
| <b>Preeclampsia (PE) risk</b>                         |                                                                  |                             |                             |
| Smokers                                               | 4/133                                                            | 0.97 (0.33–2.87); 0.950     | 0.91 (0.29–2.88); 0.872     |
| Smokers in the first trimester                        | 3/37                                                             | 2.60 (0.74–9.16); 0.136     | 2.51 (0.60–10.54); 0.208    |
| Ex-smokers                                            | 1/96                                                             | 0.33 (0.04–2.52); 0.288     | 0.31 (0.04–2.40); 0.260     |
| Women who have never smoked **                        | 20/642                                                           | 1                           | 1                           |
| Women who quit smoking in pregnancy                   | 1/9                                                              | 3.57 (0.43–29.52); 0.238    | 2.25 (0.2–24.66); 0.508     |
| Women who reduced smoking in pregnancy                | 1/6                                                              | 5.35 (0.62–46.54); 0.129    | 2.47 (0.21–29.33); 0.474    |
| Women who smoked unchanged until the end of pregnancy | 1/22                                                             | 1.46 (0.19–11.37); 0.718    | 2.49 (0.27–22.51); 0.418    |
| Women who have never smoked ***                       | 20/642                                                           | 1                           | 1                           |
| Ex-smokers                                            | 1/96                                                             | 0.13 (0.01–1.28); 0.08      | 0.21 (0.01–5.12); 0.335     |
| Smokers in the first trimester **                     | 3/37                                                             | 1                           | 1                           |
| Women who quit smoking in pregnancy                   | 1/9                                                              | 1.56 (0.13–19.24); 0.731    | 1.00 (0.01–80.05); 1.0      |
| Women who reduced smoking in pregnancy                | 1/6                                                              | 2.58 (0.20–33.24); 0.467    | -                           |
| Women who smoked unchanged until the end of pregnancy | 1/22                                                             | 0.34 (0.03–4.11); 0.397     | 0.35 (0.01–20.21); 0.612    |
| Smokers in the first trimester ***,#                  | 3/37                                                             | 1                           | 1                           |

\* AOR: adjusted odds ratios (CI—confidence intervals) calculated in the multivariate logistic regression ( $p < 0.05$  was assumed to be significant);

\*\* In the analyses, odds ratios were calculated after adjustment for maternal age, primiparous, pre-pregnancy BMI, gestational weight gain outside the range of the recommendations regardless of the BMI category, prior PIH and infertility treatment;

\*\*\* In the analyses, odds ratios were calculated after adjustment for maternal age, primiparous, pre-pregnancy BMI, gestational weight gain outside the range of the recommendations; # The reference category were variables other than those studied.

**Table S3.** The odds ratios of gestational hypertension (GH) and preeclampsia (PE) for smoking in the first trimester, after dissection into pre-pregnancy BMI categories.

| <b>Odds Ratios of GH and PE for Smoking in the First Trimester, in the Pre-Pregnancy BMI Categories</b> |                            |                                            |                            |                                            |
|---------------------------------------------------------------------------------------------------------|----------------------------|--------------------------------------------|----------------------------|--------------------------------------------|
|                                                                                                         | <b>Cases/<br/>Controls</b> | <b>GH risk<br/>OR * (95% CI); <i>p</i></b> | <b>Cases/<br/>Controls</b> | <b>PE risk<br/>OR * (95% CI); <i>p</i></b> |
| <b>Whole cohort</b>                                                                                     |                            |                                            |                            |                                            |
| Smoking in the first trimester                                                                          | 17/37                      | 3.60 (1.94–6.68); <0.001                   | 3/37                       | 2.60 (0.74–9.16); 0.136                    |
| Women who have never smoked                                                                             | 82/642                     | 1                                          | 20/642                     | 1                                          |
| <b>Underweight</b>                                                                                      |                            |                                            |                            |                                            |
| Smoking in the first trimester                                                                          | 1/3                        | -                                          | 1/3                        | 11.0 (0.54–223.89); 0.119                  |
| Women who have never smoked                                                                             | 0/33                       | 1                                          | 1/33                       | 1                                          |
| <b>Normal BMI</b>                                                                                       |                            |                                            |                            |                                            |
| Smoking in the first trimester                                                                          | 6/23                       | 2.98 (1.15–7.74); 0.025                    | 1/23                       | 2.84 (0.34–24.05); 0.339                   |
| Women who have never smoked                                                                             | 40/457                     | 1                                          | 7/457                      | 1                                          |
| <b>Overweight</b>                                                                                       |                            |                                            |                            |                                            |
| Smoking in the first trimester                                                                          | 6/7                        | 4.67 (1.42–15.36); 0.011                   | 0/7                        | -                                          |
| Women who have never smoked                                                                             | 20/109                     | 1                                          | 4/109                      | 1                                          |
| <b>Obesity</b>                                                                                          |                            |                                            |                            |                                            |
| Smoking in the first trimester                                                                          | 4/4                        | 1.96 (0.45–8.57); 0.374                    | 1/4                        | 1.34 (0.13–13.64); 0.803                   |
| Women who have never smoked                                                                             | 22/43                      | 1                                          | 8/43                       | 1                                          |

\* OR: crude odds ratios (CI—confidence intervals) calculated in the univariate logistic regression ( $p < 0.05$  was assumed to be significant); BMI: body mass index; GH: isolated gestational hypertension; PE: preeclampsia.
